# Supplementary material for: MicroRNA-133b alleviates doxorubicin-induced cardiomyocyte apoptosis and cardiac fibrosis by targeting PTBP1 and TAGLN2
Source: PubMed Central journal article supplement — Int J Mol Med. 2021 May 11;48(1):125. doi: 10.3892/ijmm.2021.4958 (PMC8128419; doi:10.3892/ijmm.2021.4958), 2021-05-11

Figure S1. Effects of BAX on the protein expression levels of collagen I, III and IV, and fibronectin in HL-1 cardiomyocytes and overexpression efficiency of PTBP1 and TAGLN2. (A) BAX overexpression efficacy in HL-1 cardiomyocytes was verified by RT-qPCR. \*\* $P < 0.01$  vs. CON. (B) Effects of BAX overexpression on the protein expression levels of collagen I, III and IV, and fibronectin in DOX-treated HL-1 cardiomyocytes. (C) PTBP1 and (D) TAGLN2 overexpression efficiency was verified by RT-qPCR. \*\* $P < 0.01$  vs. NC. miR, microRNA; DOX, doxorubicin; CON, control; NC, negative control; RT-qPCR, reverse transcription-quantitative PCR.

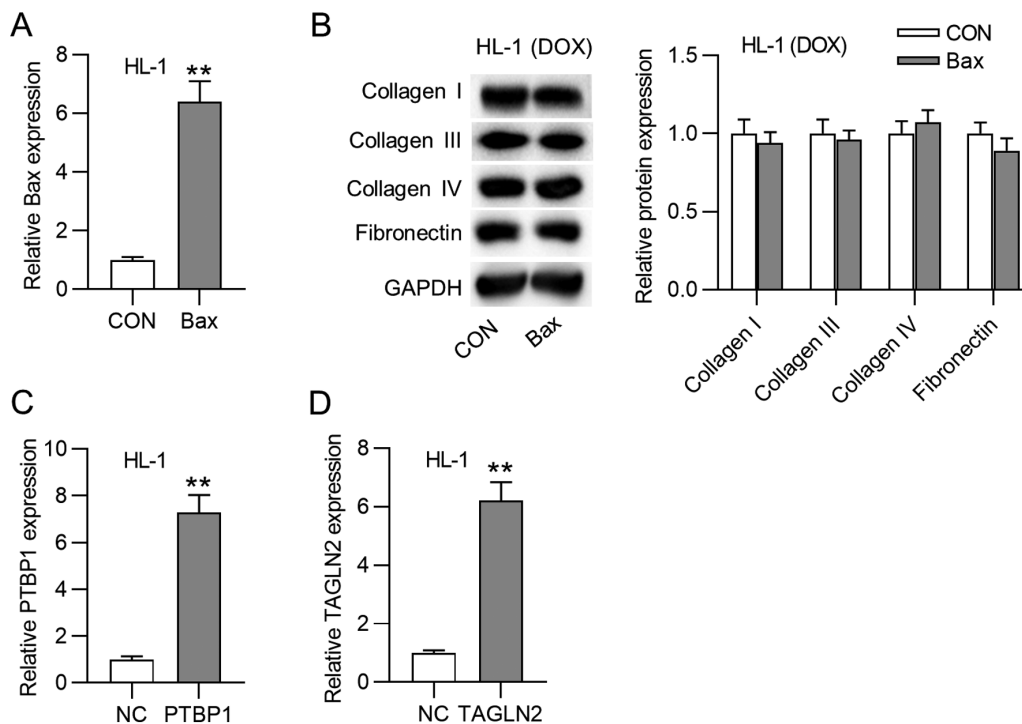

Supplement: Supplementary_Data.pdf [file Supplementary_Data.pdf]
